# Supplementary material for: Major agricultural changes required to mitigate phosphorus losses under climate change
Source: PubMed Central journal article supplement (PMC5534432; doi:10.1038/s41467-017-00232-0), 2017-07-31
Supplement: 41467_2017_232_MOESM1_ESM.pdf [file 41467_2017_232_MOESM1_ESM.pdf]

File name: Supplementary Information

Description: Supplementary Figures, Supplementary Tables and Supplementary References

File name: Supplementary Data 1

Description: Discharge and total phosphorus load predicted by 'Hydrological Predictions for the Environment' (HYPE) and 'Data-Based Mechanistic' (DBM) models for the future

File name: Supplementary Data 2

Description: Total phosphorus loads predicted by 'Hydrological Predictions for the Environment' (HYPE) model for combined land management change (-80%, -50%, -20%, no change, +20%, +50%, +80% change in P inputs) and climate change scenarios for the Eden, Wensum and Avon Demonstration Test Catchments.

File name: Supplementary Data 3

Description: Hydrological Predictions for the Environment (HYPE) model: Parameter ranges used in HYPE behavioural runs.

File name: Supplementary Data 4

Description: Hydrological Predictions for the Environment (HYPE) model fit statistics

File name: Supplementary Data 5

Description: Data-Based Mechanistic model (DBM) fit statistics

File name: Peer Review File

Description:

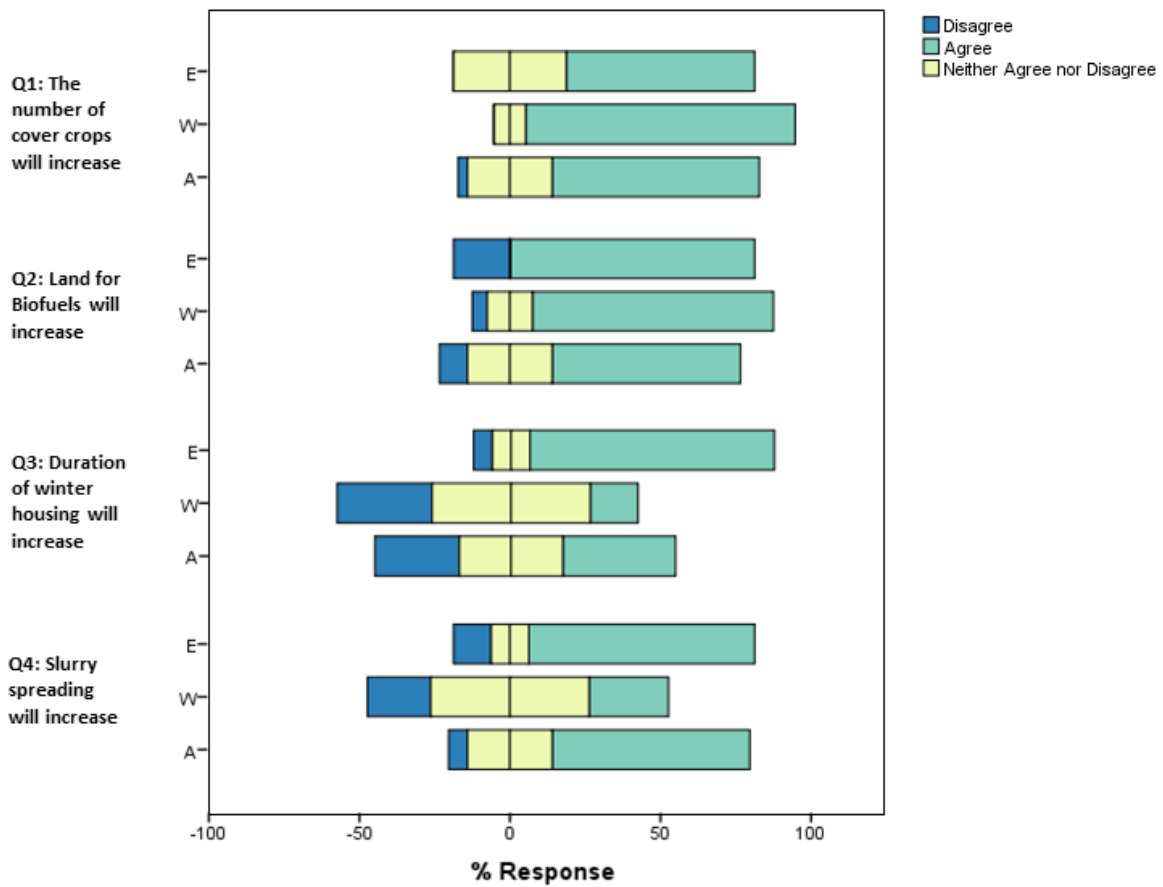

Supplementary Figure 1 Stakeholder responses to the four questions (Q1 – Q4) on mitigation options. Responses were grouped as positive (strongly agree or agree), neutral (neither agree nor disagree) or negative (disagree or strongly disagree). Workshop locations were Eden (E), Wensum (W) and Hampshire Avon (A). Numbers of participants were n(E)=16; n(W)=20; n(A)=32.

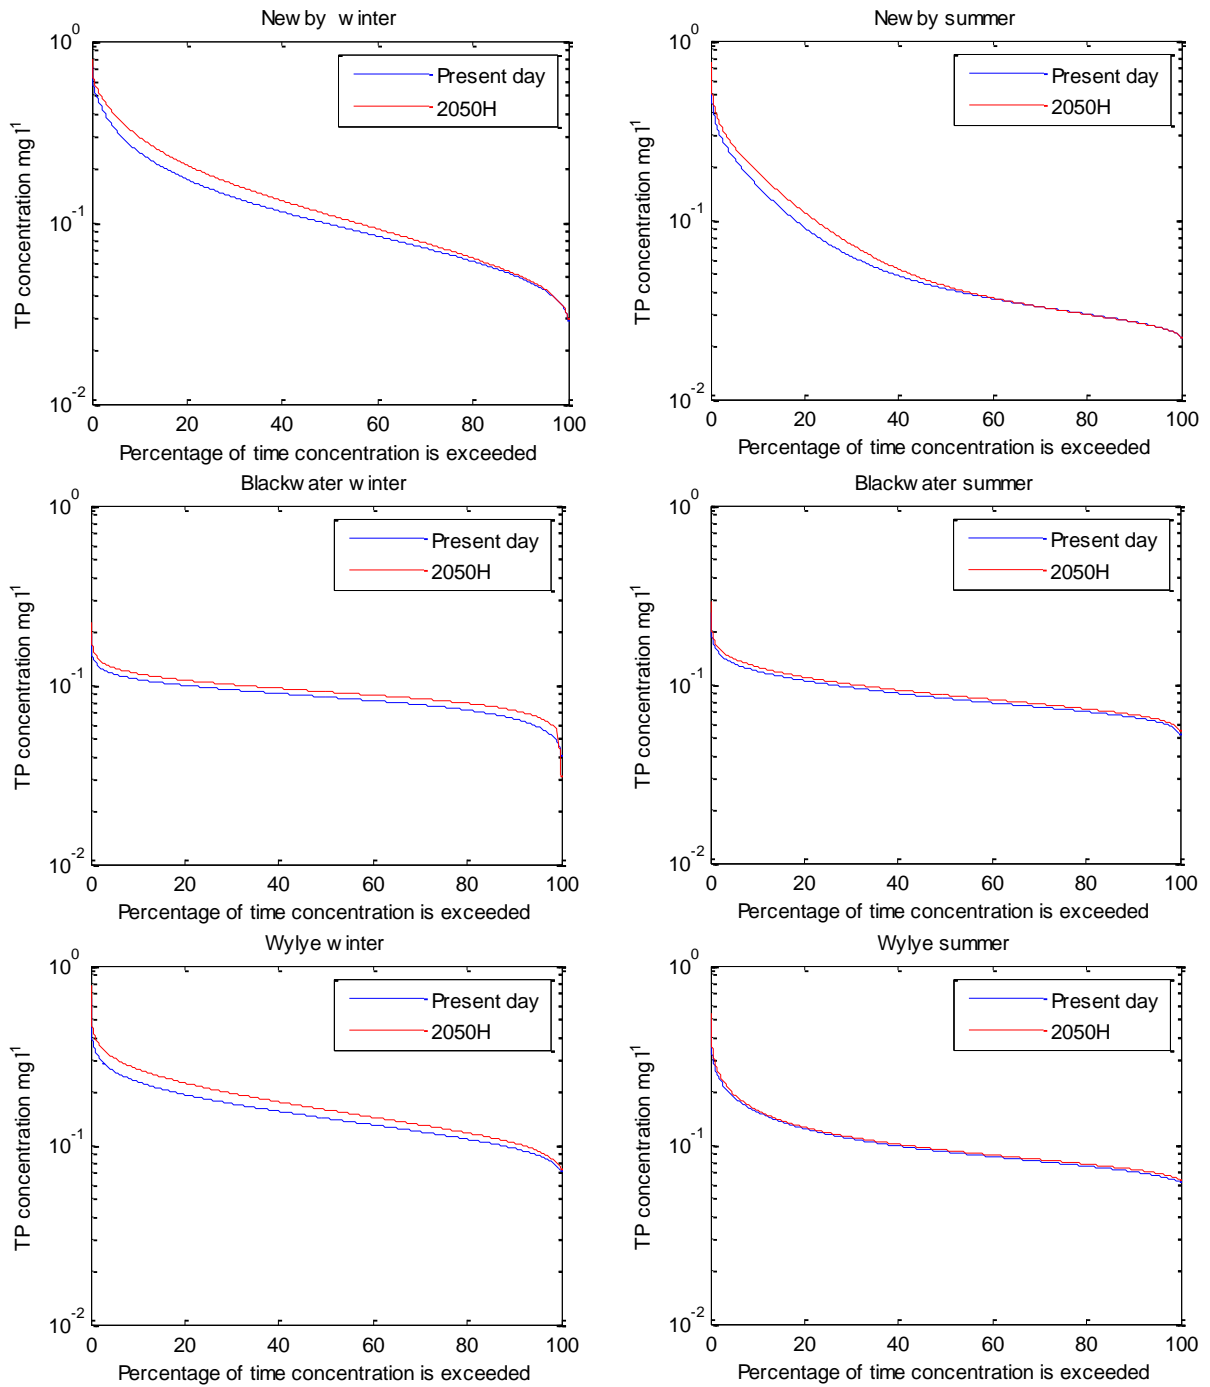

Supplementary Figure 2 Winter and summer concentration-duration curves predicted with HYPE for each catchment; Newby Beck, Eden, winter and summer (top); Blackwater, Wensum, winter and summer (middle); Wylie, Avon, winter and summer (bottom).

Supplementary Table 1 Model structures and parameters for Data-Based Mechanistic (DBM) models used in simulations

| Site               | Model output    | Model input           | Model structure      | $\beta$ | a1                   | a2                    | b1                  | b2                    |
|--------------------|-----------------|-----------------------|----------------------|---------|----------------------|-----------------------|---------------------|-----------------------|
| Newby, Eden        | Discharge Q     | Rainfall R            | Continuous [2, 2, 1] | 0.37    | $0.3474 \pm 0.0064$  | $0.0023 \pm 0.0001$   | $0.1646 \pm 0.0026$ | $0.0026 \pm 0.0001$   |
| Newby, Eden        | Total P load TP | Effective rainfall Re | Continuous [1, 1, 1] |         | $0.6429 \pm 0.0191$  |                       | $2.0086 \pm 0.0562$ |                       |
| Blackwater, Wensum | Discharge Q     | Rainfall R            | Discrete [2, 2, 6]   | 0.65    | $-1.9324 \pm 0.0021$ | $0.9325 \pm 0.0021$   | $0.0526 \pm 0.0012$ | $-0.0521 \pm 0.0012$  |
| Blackwater, Wensum | Total P load TP | Rainfall R            | Continuous [2, 2, 4] |         | $0.0826 \pm 0.0018$  | $0.00021 \pm 0.00003$ | $0.0335 \pm 0.0012$ | $0.00016 \pm 0.00002$ |
| Wylde, Avon        | Discharge Q     | Rainfall R            | Discrete [2, 2, 6]   | 0.59    | $-1.7785 \pm 0.0109$ | $0.7790 \pm 0.0108$   | $0.0440 \pm 0.0016$ | $-0.0428 \pm 0.0015$  |
| Wylde, Avon        | Total P load TP | Effective rainfall Re | Continuous [2, 2, 6] |         | $0.1660 \pm 0.0080$  | $0.00029 \pm 0.00003$ | $1.3015 \pm 0.0506$ | $0.0054 \pm 0.0006$   |

Supplementary Table 2 Differences between RCM 1.5 km climate model and UKCP09-WG, as used in this study

|                     | 1.5 km Regional Climate Model (RCM 1.5 km)                                                                                                                                                                                 | UKCP09 Weather Generator (UKCP09-WG)                                                                                                    |
|---------------------|----------------------------------------------------------------------------------------------------------------------------------------------------------------------------------------------------------------------------|-----------------------------------------------------------------------------------------------------------------------------------------|
| Source model        | 1.5 km UKV regional climate model (driven by 12km and 60km climate models)                                                                                                                                                 | 11 member HadRM3 ensemble, 25km resolution.                                                                                             |
| Bias correction     | Not bias corrected (see footnote)*                                                                                                                                                                                         | UKCP09-WG has little bias as it is fitted to the 5 x 5 km gridded rainfall observations (1961-1990)                                     |
| Emissions scenarios | RCP8.5                                                                                                                                                                                                                     | SRES Storylines Low (b1), Medium (a1b), High (a1fi)                                                                                     |
| Periods             | Baseline (1996-2009), 13 years ~2100.                                                                                                                                                                                      | Baseline (1961-1990), 2050s (2040-2069), 2080s (2070-2099); 100 randomly generated runs of 30 years for each                            |
| Data resolution     | 1.5 km                                                                                                                                                                                                                     | Point-based (no spatial coherence between adjacent 5 km grid squares)                                                                   |
| Advantages          | Convection permitting model allows more realistic representation of rainfall extremes at local scale.<br>Large number of variables available.                                                                              | Feasible to produce large numbers of scenarios for uncertainty analysis<br>Point-based time series based on statistics of local weather |
| Disadvantages       | Large data volumes only permit relatively short run lengths, limiting ability to capture extreme events in the time series.<br>Too computationally demanding to generate large ensembles of runs for uncertainty analysis. | Projections not spatially coherent<br>Statistical model cannot capture physical mechanisms.<br>Limited number of variables available.   |

\* Previous work using bias corrected climate data and an ensemble of hydrological and biome models as part of the Inter-Sectoral Impact Model Intercomparison Project (ISI-MIP)<sup>1</sup> has shown that although the bias correction largely removes the impact of differences between GCMs in the present-day baseline data, there is still large variability due to the different impact models and the processes included; for instance, the effect of CO<sub>2</sub> on runoff added to the uncertainty in model projections.

Supplementary Table 3 Metadata for generation of UKCP09 Weather Generator time series data for Newby Beck, Cumbria. Emissions scenarios are from SRES storylines: b1 (Low); a1b (Medium); a1fi (High).

|                       | Newby Beck at Newby, Eden, Cumbria |      |      |           |      |      |
|-----------------------|------------------------------------|------|------|-----------|------|------|
| Dataset               | wxgen                              |      |      |           |      |      |
| WGVersionNumber       | 2.1.0                              |      |      |           |      |      |
| DataOutputFormat      | csv                                |      |      |           |      |      |
| SpatialAverage        | grid_box_5km                       |      |      |           |      |      |
| Location              | 3650525; 3600525; 3600520; 3650520 |      |      |           |      |      |
| SamplingMethod        | random                             |      |      |           |      |      |
| WGTemporalFrequency   | hourly                             |      |      |           |      |      |
| NumberOfRandomSamples | 100                                |      |      |           |      |      |
| WGRunDuration         | 30                                 |      |      |           |      |      |
| WGRandomSeedSwitch    | True                               | True | True | True      | True | True |
| EmissionsScenarios    | b1                                 | a1b  | a1fi | b1        | a1b  | a1fi |
| TimePeriods           | 2040-2069                          |      |      | 2070-2099 |      |      |
| WGRandomSeedValue     | 2014                               | 2015 | 2016 | 2083      | 2081 | 2082 |

Supplementary Table 4 Metadata for generation of UKCP09 Weather Generator time series data for Blackwater, Wensum. Emissions scenarios are from SRES storylines: b1 (Low); a1b (Medium); a1fi (High).

|                       |                                              |      |      |           |      |      |
|-----------------------|----------------------------------------------|------|------|-----------|------|------|
|                       | Blackwater at Park Farm, Wensum, East Anglia |      |      |           |      |      |
| Dataset               | wxgen                                        |      |      |           |      |      |
| WGVersionNumber       | 2.1.0                                        |      |      |           |      |      |
| DataOutputFormat      | csv                                          |      |      |           |      |      |
| SpatialAverage        | grid_box_5km                                 |      |      |           |      |      |
| Location              | 6150325; 6150330; 6100330; 6100325           |      |      |           |      |      |
| SamplingMethod        | random                                       |      |      |           |      |      |
| WGTemporalFrequency   | hourly                                       |      |      |           |      |      |
| NumberOfRandomSamples | 100                                          |      |      |           |      |      |
| WGRunDuration         | 30                                           |      |      |           |      |      |
| WGRandomSeedSwitch    | True                                         | True | True | True      | True | True |
| EmissionsScenarios    | b1                                           | a1b  | a1fi | b1        | a1b  | a1fi |
| TimePeriods           | 2040-2069                                    |      |      | 2070-2099 |      |      |
| WGRandomSeedValue     | 2001                                         | 2002 | 2003 | 2004      | 2005 | 2006 |

Supplementary Table 5 Metadata for generation of UKCP09 Weather Generator time series data for Wylve, Avon. Emissions scenarios are from SRES storylines: b1 (Low); a1b (Medium); a1fi (High).

|                       |                                            |      |      |           |      |      |
|-----------------------|--------------------------------------------|------|------|-----------|------|------|
|                       | Wylve at Brixton Deverill, Avon, Hampshire |      |      |           |      |      |
| Dataset               | wxgen                                      |      |      |           |      |      |
| WGVersionNumber       | 2.1.0                                      |      |      |           |      |      |
| DataOutputFormat      | csv                                        |      |      |           |      |      |
| SpatialAverage        | grid_box_5km                               |      |      |           |      |      |
| Location              | 3800140; 3850140; 3900140                  |      |      |           |      |      |
| SamplingMethod        | random                                     |      |      |           |      |      |
| WGTemporalFrequency   | hourly                                     |      |      |           |      |      |
| NumberOfRandomSamples | 100                                        |      |      |           |      |      |
| WGRunDuration         | 30                                         |      |      |           |      |      |
| WGRandomSeedSwitch    | True                                       | True | True | True      | True | True |
| EmissionsScenarios    | b1                                         | a1b  | a1fi | b1        | a1b  | a1fi |
| TimePeriods           | 2040-2069                                  |      |      | 2070-2099 |      |      |
| WGRandomSeedValue     | 2020                                       | 2021 | 2022 | 2085      | 2086 | 2087 |



Supplementary Table 6 Discussion questions for stakeholder workshops on agricultural change and interpretation for modelling

Discussion questions for the Eden (the same questions (apart from catchment name) were asked in the Wensum and Avon catchments)

1. How do you think percentages of land use class will alter in the Eden in the future?
2. How do you think crop production will change in the Eden in the future?
3. How do you think livestock production will change in the Eden in the future?

Supplementary Table 7 Questionnaire completed by stakeholder workshop participants in Eden catchment. The same questionnaire (apart from catchment name) was completed in Wensum and Avon catchments.

Land Use and Land Management scenarios

Eden 5<sup>th</sup> April 2016

What is your role in water quality management?

- Farmer/land manager
- Farm advisor
- Policy advisor
- Regulator
- Academic
- Other (please specify)

If you have a particular catchment association (Morland/Pow/Eden), please answer the remaining questions with that catchment in mind. Which catchment are you answering for?

- Morland/Pow
- Eden
- General

How important do you consider the following factors to be in contributing to land use and land management changes?

|                           | Very Important           | Important                | Neutral                  | Unimportant              | Very Unimportant         |
|---------------------------|--------------------------|--------------------------|--------------------------|--------------------------|--------------------------|
| Climate change            | <input type="checkbox"/> | <input type="checkbox"/> | <input type="checkbox"/> | <input type="checkbox"/> | <input type="checkbox"/> |
| Economics                 | <input type="checkbox"/> | <input type="checkbox"/> | <input type="checkbox"/> | <input type="checkbox"/> | <input type="checkbox"/> |
| Policy                    | <input type="checkbox"/> | <input type="checkbox"/> | <input type="checkbox"/> | <input type="checkbox"/> | <input type="checkbox"/> |
| Legislation               | <input type="checkbox"/> | <input type="checkbox"/> | <input type="checkbox"/> | <input type="checkbox"/> | <input type="checkbox"/> |
| Technology                | <input type="checkbox"/> | <input type="checkbox"/> | <input type="checkbox"/> | <input type="checkbox"/> | <input type="checkbox"/> |
| Other<br>(please specify) |                          |                          |                          |                          |                          |

Overall land use

Studies on regional land use change scenarios indicate that, in some areas, the percentage of land used for food production will decrease (global food production will be concentrated in the most productive areas, and near regions of highest population increase, with increased food demand more than balanced by improvements in technology and crop yields). Land formerly used for food production may be replaced by woodland or biofuels or abandoned

|                                             | Strongly Agree           | Agree                    | Neither agree nor disagree | Disagree                 | Strongly Disagree        |
|---------------------------------------------|--------------------------|--------------------------|----------------------------|--------------------------|--------------------------|
| Land for crop production will increase      | <input type="checkbox"/> | <input type="checkbox"/> | <input type="checkbox"/>   | <input type="checkbox"/> | <input type="checkbox"/> |
| Land for livestock production will increase | <input type="checkbox"/> | <input type="checkbox"/> | <input type="checkbox"/>   | <input type="checkbox"/> | <input type="checkbox"/> |
| Land for forestry will increase             | <input type="checkbox"/> | <input type="checkbox"/> | <input type="checkbox"/>   | <input type="checkbox"/> | <input type="checkbox"/> |
| Land for biofuels will increase             | <input type="checkbox"/> | <input type="checkbox"/> | <input type="checkbox"/>   | <input type="checkbox"/> | <input type="checkbox"/> |
| Other comments                              |                          |                          |                            |                          |                          |

Crop production

Higher seasonal rainfall may make some crops increasingly unviable

Higher temperatures may extend the growing season, making different crops more viable

Incentives for water quality management may be improved (CAP greening)

|                                                         | Strongly Agree           | Agree                    | Neither agree nor disagree | Disagree                 | Strongly Disagree        |
|---------------------------------------------------------|--------------------------|--------------------------|----------------------------|--------------------------|--------------------------|
| Maize production will increase                          | <input type="checkbox"/> | <input type="checkbox"/> | <input type="checkbox"/>   | <input type="checkbox"/> | <input type="checkbox"/> |
| Other cereals (for food) will increase (please specify) | <input type="checkbox"/> | <input type="checkbox"/> | <input type="checkbox"/>   | <input type="checkbox"/> | <input type="checkbox"/> |
| The number of different crops will increase             | <input type="checkbox"/> | <input type="checkbox"/> | <input type="checkbox"/>   | <input type="checkbox"/> | <input type="checkbox"/> |
| Cover crops will increase                               | <input type="checkbox"/> | <input type="checkbox"/> | <input type="checkbox"/>   | <input type="checkbox"/> | <input type="checkbox"/> |
| Other comments                                          |                          |                          |                            |                          |                          |

Livestock production

Higher temperatures may extend the growing season

Regulations on slurry spreading are likely to become tighter

Dairy herds are likely to get fewer but larger, to maintain viability

|                                                                           | Strongly Agree           | Agree                    | Neither agree nor disagree | Disagree                 | Strongly Disagree        |
|---------------------------------------------------------------------------|--------------------------|--------------------------|----------------------------|--------------------------|--------------------------|
| Livestock density in the catchment will increase                          | <input type="checkbox"/> | <input type="checkbox"/> | <input type="checkbox"/>   | <input type="checkbox"/> | <input type="checkbox"/> |
| Capacity for winter housing will increase                                 | <input type="checkbox"/> | <input type="checkbox"/> | <input type="checkbox"/>   | <input type="checkbox"/> | <input type="checkbox"/> |
| Duration of winter housing will increase (livestock in earlier/out later) | <input type="checkbox"/> | <input type="checkbox"/> | <input type="checkbox"/>   | <input type="checkbox"/> | <input type="checkbox"/> |
| Slurry spreading (total amount) will increase                             | <input type="checkbox"/> | <input type="checkbox"/> | <input type="checkbox"/>   | <input type="checkbox"/> | <input type="checkbox"/> |
| Covered yards will become more common                                     | <input type="checkbox"/> | <input type="checkbox"/> | <input type="checkbox"/>   | <input type="checkbox"/> | <input type="checkbox"/> |
| Other comments                                                            |                          |                          |                            |                          |                          |

Thank you!

## Supplementary Reference

1. Davie JCS, *et al.* Comparing projections of future changes in runoff from hydrological and biome models in ISI-MIP. *Earth Syst Dynam* **4**, 359-374 (2013).
